# Supplementary material
Source: bioRxiv or medRxiv preprint supplement (https://www.medrxiv.org/content/medrxiv/early/2020/12/22/2020.12.21.20248665/DC1/embed/media-1.pdf)
Supplement: Supplementary file [file media-1.pdf]

Supplementary Information for:

# The EEG multiverse of schizophrenia

da Cruz, Gordillo et al.

# 1. Supplementary Tables

Supplementary Table 1 - List of the abbreviation of the EEG features

|                               |                                                                                                 |
|-------------------------------|-------------------------------------------------------------------------------------------------|
| <b>ampl total power alpha</b> | Amplitude total power in alpha band                                                             |
| <b>ampl total power beta</b>  | Amplitude total power in beta band                                                              |
| <b>ampl total power delta</b> | Amplitude total power in delta band                                                             |
| <b>ampl total power gamma</b> | Amplitude total power in gamma band                                                             |
| <b>ampl total power theta</b> | Amplitude total power in theta band                                                             |
| <b>approx entropy</b>         | Full-band EEG Approximate Entropy                                                               |
| <b>asymmetry ampl alpha</b>   | Range EEG asymmetry in alpha band                                                               |
| <b>asymmetry ampl beta</b>    | Range EEG asymmetry in beta band                                                                |
| <b>asymmetry ampl delta</b>   | Range EEG asymmetry in delta band                                                               |
| <b>asymmetry ampl gamma</b>   | Range EEG asymmetry in gamma band                                                               |
| <b>asymmetry ampl theta</b>   | Range EEG asymmetry in theta band                                                               |
| <b>betw cen e-dtf alpha</b>   | Betweenness Centrality of the directed transfer function at electrode level in alpha band       |
| <b>betw cen e-dtf beta</b>    | Betweenness Centrality of the directed transfer function at electrode level in beta band        |
| <b>betw cen e-dtf delta</b>   | Betweenness Centrality of the directed transfer function at electrode level in delta band       |
| <b>betw cen e-dtf gamma</b>   | Betweenness Centrality of the directed transfer function at electrode level in gamma band       |
| <b>betw cen e-dtf theta</b>   | Betweenness Centrality of the directed transfer function at electrode level in theta band       |
| <b>betw cen e-icoh alpha</b>  | Betweenness Centrality of the imaginary part of coherency at electrode level in alpha band      |
| <b>betw cen e-icoh beta</b>   | Betweenness Centrality of the imaginary part of coherency at electrode level in beta band       |
| <b>betw cen e-icoh delta</b>  | Betweenness Centrality of the imaginary part of coherency at electrode level in delta band      |
| <b>betw cen e-icoh gamma</b>  | Betweenness Centrality of the imaginary part of coherency at electrode level in gamma band      |
| <b>betw cen e-icoh theta</b>  | Betweenness Centrality of the imaginary part of coherency at electrode level in theta band      |
| <b>betw cen e-plv alpha</b>   | Betweenness Centrality of the phase-locking value at electrode level in alpha band              |
| <b>betw cen e-plv beta</b>    | Betweenness Centrality of the phase-locking value at electrode level in beta band               |
| <b>betw cen e-plv delta</b>   | Betweenness Centrality of the phase-locking value at electrode level in delta band              |
| <b>betw cen e-plv gamma</b>   | Betweenness Centrality of the phase-locking value at electrode level in gamma band              |
| <b>betw cen e-plv theta</b>   | Betweenness Centrality of the phase-locking value at electrode level in theta band              |
| <b>betw cen s-ips alpha</b>   | Betweenness Centrality of the instantaneous phase synchronization at source level in alpha band |
| <b>betw cen s-ips beta</b>    | Betweenness Centrality of the instantaneous phase synchronization at source level in beta band  |

|                                 |                                                                                                 |
|---------------------------------|-------------------------------------------------------------------------------------------------|
| <b>betw cen s-ips delta</b>     | Betweenness Centrality of the instantaneous phase synchronization at source level in delta band |
| <b>betw cen s-ips gamma</b>     | Betweenness Centrality of the instantaneous phase synchronization at source level in gamma band |
| <b>betw cen s-ips theta</b>     | Betweenness Centrality of the instantaneous phase synchronization at source level in theta band |
| <b>betw cen s-lcoh alpha</b>    | Betweenness Centrality of the lagged coherence at source level in alpha band                    |
| <b>betw cen s-lcoh beta</b>     | Betweenness Centrality of the lagged coherence at source level in beta band                     |
| <b>betw cen s-lcoh delta</b>    | Betweenness Centrality of the lagged coherence at source level in delta band                    |
| <b>betw cen s-lcoh gamma</b>    | Betweenness Centrality of the lagged coherence at source level in gamma band                    |
| <b>betw cen s-lcoh theta</b>    | Betweenness Centrality of the lagged coherence at source level in theta band                    |
| <b>betw cen s-lps alpha</b>     | Betweenness Centrality of the lagged phase synchronization at source level in alpha band        |
| <b>betw cen s-lps beta</b>      | Betweenness Centrality of the lagged phase synchronization at source level in beta band         |
| <b>betw cen s-lps delta</b>     | Betweenness Centrality of the lagged phase synchronization at source level in delta band        |
| <b>betw cen s-lps gamma</b>     | Betweenness Centrality of the lagged phase synchronization at source level in gamma band        |
| <b>betw cen s-lps theta</b>     | Betweenness Centrality of the lagged phase synchronization at source level in theta band        |
| <b>clust coeff e-dtf alpha</b>  | Clustering Coefficient of the directed transfer function at electrode level in alpha band       |
| <b>clust coeff e-dtf beta</b>   | Clustering Coefficient of the directed transfer function at electrode level in beta band        |
| <b>clust coeff e-dtf delta</b>  | Clustering Coefficient of the directed transfer function at electrode level in delta band       |
| <b>clust coeff e-dtf gamma</b>  | Clustering Coefficient of the directed transfer function at electrode level in gamma band       |
| <b>clust coeff e-dtf theta</b>  | Clustering Coefficient of the directed transfer function at electrode level in theta band       |
| <b>clust coeff e-icoh alpha</b> | Clustering Coefficient of the imaginary part of coherency at electrode level in alpha band      |
| <b>clust coeff e-icoh beta</b>  | Clustering Coefficient of the imaginary part of coherency at electrode level in beta band       |
| <b>clust coeff e-icoh delta</b> | Clustering Coefficient of the imaginary part of coherency at electrode level in delta band      |
| <b>clust coeff e-icoh gamma</b> | Clustering Coefficient of the imaginary part of coherency at electrode level in gamma band      |
| <b>clust coeff e-icoh theta</b> | Clustering Coefficient of the imaginary part of coherency at electrode level in theta band      |
| <b>clust coeff e-plv alpha</b>  | Clustering Coefficient of the phase-locking value at electrode level in alpha band              |
| <b>clust coeff e-plv beta</b>   | Clustering Coefficient of the phase-locking value at electrode level in beta band               |
| <b>clust coeff e-plv delta</b>  | Clustering Coefficient of the phase-locking value at electrode level in delta band              |
| <b>clust coeff e-plv gamma</b>  | Clustering Coefficient of the phase-locking value at electrode level in gamma band              |
| <b>clust coeff e-plv theta</b>  | Clustering Coefficient of the phase-locking value at electrode level in theta band              |

|                                 |                                                                                                 |
|---------------------------------|-------------------------------------------------------------------------------------------------|
| <b>clust coeff s-ips alpha</b>  | Clustering Coefficient of the instantaneous phase synchronization at source level in alpha band |
| <b>clust coeff s-ips beta</b>   | Clustering Coefficient of the instantaneous phase synchronization at source level in beta band  |
| <b>clust coeff s-ips delta</b>  | Clustering Coefficient of the instantaneous phase synchronization at source level in delta band |
| <b>clust coeff s-ips gamma</b>  | Clustering Coefficient of the instantaneous phase synchronization at source level in gamma band |
| <b>clust coeff s-ips theta</b>  | Clustering Coefficient of the instantaneous phase synchronization at source level in theta band |
| <b>clust coeff s-lcoh alpha</b> | Clustering Coefficient of the lagged coherence at source level in alpha band                    |
| <b>clust coeff s-lcoh beta</b>  | Clustering Coefficient of the lagged coherence at source level in beta band                     |
| <b>clust coeff s-lcoh delta</b> | Clustering Coefficient of the lagged coherence at source level in delta band                    |
| <b>clust coeff s-lcoh gamma</b> | Clustering Coefficient of the lagged coherence at source level in gamma band                    |
| <b>clust coeff s-lcoh theta</b> | Clustering Coefficient of the lagged coherence at source level in theta band                    |
| <b>clust coeff s-lps alpha</b>  | Clustering Coefficient of the lagged phase synchronization at source level in alpha band        |
| <b>clust coeff s-lps beta</b>   | Clustering Coefficient of the lagged phase synchronization at source level in beta band         |
| <b>clust coeff s-lps delta</b>  | Clustering Coefficient of the lagged phase synchronization at source level in delta band        |
| <b>clust coeff s-lps gamma</b>  | Clustering Coefficient of the lagged phase synchronization at source level in gamma band        |
| <b>clust coeff s-lps theta</b>  | Clustering Coefficient of the lagged phase synchronization at source level in theta band        |
| <b>coeff of var ampl alpha</b>  | Range EEG coefficient of variation in alpha band                                                |
| <b>coeff of var ampl beta</b>   | Range EEG coefficient of variation in beta band                                                 |
| <b>coeff of var ampl delta</b>  | Range EEG coefficient of variation in delta band                                                |
| <b>coeff of var ampl gamma</b>  | Range EEG coefficient of variation in gamma band                                                |
| <b>coeff of var ampl theta</b>  | Range EEG coefficient of variation in theta band                                                |
| <b>correlation dimension</b>    | Full-band EEG Correlation Dimension                                                             |
| <b>dfa exponent alpha</b>       | Detrended Fluctuation Analysis exponent in alpha band                                           |
| <b>dfa exponent beta</b>        | Detrended Fluctuation Analysis exponent in beta band                                            |
| <b>dfa exponent delta</b>       | Detrended Fluctuation Analysis exponent in delta band                                           |
| <b>dfa exponent gamma</b>       | Detrended Fluctuation Analysis exponent in gamma band                                           |
| <b>dfa exponent theta</b>       | Detrended Fluctuation Analysis exponent in theta band                                           |
| <b>hfd alpha</b>                | Higuchi's Fractal Dimension in alpha band                                                       |
| <b>hfd beta</b>                 | Higuchi's Fractal Dimension in beta band                                                        |
| <b>hfd delta</b>                | Higuchi's Fractal Dimension in delta band                                                       |
| <b>hfd gamma</b>                | Higuchi's Fractal Dimension in gamma band                                                       |
| <b>hfd theta</b>                | Higuchi's Fractal Dimension in theta band                                                       |
| <b>hjorth activity</b>          | Full-band EEG Hjorth parameter activity                                                         |
| <b>hjorth complexity</b>        | Full-band EEG Hjorth parameter complexity                                                       |
| <b>hjorth mobility</b>          | Full-band EEG Hjorth parameter mobility                                                         |

|                                |                                                                                   |
|--------------------------------|-----------------------------------------------------------------------------------|
| <b>hurst exponent</b>          | Full-band Hurst Exponent                                                          |
| <b>kfd alpha</b>               | Katz's Fractal Dimension in alpha band                                            |
| <b>kfd beta</b>                | Katz's Fractal Dimension in beta band                                             |
| <b>kfd delta</b>               | Katz's Fractal Dimension in delta band                                            |
| <b>kfd gamma</b>               | Katz's Fractal Dimension in gamma band                                            |
| <b>kfd theta</b>               | Katz's Fractal Dimension in theta band                                            |
| <b>kurtosis ampl alpha</b>     | Kurtosis of the amplitude in alpha band                                           |
| <b>kurtosis ampl beta</b>      | Kurtosis of the amplitude in beta band                                            |
| <b>kurtosis ampl delta</b>     | Kurtosis of the amplitude in delta band                                           |
| <b>kurtosis ampl gamma</b>     | Kurtosis of the amplitude in gamma band                                           |
| <b>kurtosis ampl theta</b>     | Kurtosis of the amplitude in theta band                                           |
| <b>life time alpha</b>         | Life-time statistics of alpha bursts                                              |
| <b>life time beta</b>          | Life-time statistics of beta bursts                                               |
| <b>life time delta</b>         | Life-time statistics of delta bursts                                              |
| <b>life time gamma</b>         | Life-time statistics of gamma bursts                                              |
| <b>life time theta</b>         | Life-time statistics of theta bursts                                              |
| <b>lyapunov exponent</b>       | Full-band EEG Lyapunov Exponent                                                   |
| <b>lzc exhaustive</b>          | Lempel-Ziv complexity exhaustive                                                  |
| <b>lzc primitive</b>           | Lempel-Ziv complexity primitive                                                   |
| <b>mean ampl alpha</b>         | Mean amplitude of the envelope in alpha band                                      |
| <b>mean ampl beta</b>          | Mean amplitude of the envelope in beta band                                       |
| <b>mean ampl delta</b>         | Mean amplitude of the envelope in delta band                                      |
| <b>mean ampl gamma</b>         | Mean amplitude of the envelope in gamma band                                      |
| <b>mean ampl theta</b>         | Mean amplitude of the envelope in theta band                                      |
| <b>microstates temporal</b>    | EEG microstates temporal parameters: mean duration, time coverage and occurrence  |
| <b>microstates transitions</b> | EEG microstates transition probabilities                                          |
| <b>mod index alpha-beta</b>    | Modulation Index of alpha phase on beta amplitude                                 |
| <b>mod index alpha-gamma</b>   | Modulation Index of alpha phase on gamma amplitude                                |
| <b>mod index beta-gamma</b>    | Modulation Index of beta phase on gamma amplitude                                 |
| <b>mod index delta-alpha</b>   | Modulation Index of delta phase on alpha amplitude                                |
| <b>mod index delta-beta</b>    | Modulation Index of delta phase on beta amplitude                                 |
| <b>mod index delta-gamma</b>   | Modulation Index of delta phase on gamma amplitude                                |
| <b>mod index theta-alpha</b>   | Modulation Index of theta phase on alpha amplitude                                |
| <b>mod index theta-beta</b>    | Modulation Index of theta phase on beta amplitude                                 |
| <b>mod index theta-gamma</b>   | Modulation Index of theta phase on gamma amplitude                                |
| <b>node str e-dtf alpha</b>    | Node Strength of the directed transfer function at electrode level in alpha band  |
| <b>node str e-dtf beta</b>     | Node Strength of the directed transfer function at electrode level in beta band   |
| <b>node str e-dtf delta</b>    | Node Strength of the directed transfer function at electrode level in delta band  |
| <b>node str e-dtf gamma</b>    | Node Strength of the directed transfer function at electrode level in gamma band  |
| <b>node str e-dtf theta</b>    | Node Strength of the directed transfer function at electrode level in theta band  |
| <b>node str e-icoh alpha</b>   | Node Strength of the imaginary part of coherency at electrode level in alpha band |
| <b>node str e-icoh beta</b>    | Node Strength of the imaginary part of coherency at electrode level in beta band  |
| <b>node str e-icoh delta</b>   | Node Strength of the imaginary part of coherency at electrode level in delta band |

|                              |                                                                                        |
|------------------------------|----------------------------------------------------------------------------------------|
| <b>node str e-icoh gamma</b> | Node Strength of the imaginary part of coherency at electrode level in gamma band      |
| <b>node str e-icoh theta</b> | Node Strength of the imaginary part of coherency at electrode level in theta band      |
| <b>node str e-plv alpha</b>  | Node Strength of the phase-locking value at electrode level in alpha band              |
| <b>node str e-plv beta</b>   | Node Strength of the phase-locking value at electrode level in beta band               |
| <b>node str e-plv delta</b>  | Node Strength of the phase-locking value at electrode level in delta band              |
| <b>node str e-plv gamma</b>  | Node Strength of the phase-locking value at electrode level in gamma band              |
| <b>node str e-plv theta</b>  | Node Strength of the phase-locking value at electrode level in theta band              |
| <b>node str s-ips alpha</b>  | Node Strength of the instantaneous phase synchronization at source level in alpha band |
| <b>node str s-ips beta</b>   | Node Strength of the instantaneous phase synchronization at source level in beta band  |
| <b>node str s-ips delta</b>  | Node Strength of the instantaneous phase synchronization at source level in delta band |
| <b>node str s-ips gamma</b>  | Node Strength of the instantaneous phase synchronization at source level in gamma band |
| <b>node str s-ips theta</b>  | Node Strength of the instantaneous phase synchronization at source level in theta band |
| <b>node str s-lcoh alpha</b> | Node Strength of the lagged coherence at source level in alpha band                    |
| <b>node str s-lcoh beta</b>  | Node Strength of the lagged coherence at source level in beta band                     |
| <b>node str s-lcoh delta</b> | Node Strength of the lagged coherence at source level in delta band                    |
| <b>node str s-lcoh gamma</b> | Node Strength of the lagged coherence at source level in gamma band                    |
| <b>node str s-lcoh theta</b> | Node Strength of the lagged coherence at source level in theta band                    |
| <b>node str s-lps alpha</b>  | Node Strength of the lagged phase synchronization at source level in alpha band        |
| <b>node str s-lps beta</b>   | Node Strength of the lagged phase synchronization at source level in beta band         |
| <b>node str s-lps delta</b>  | Node Strength of the lagged phase synchronization at source level in delta band        |
| <b>node str s-lps gamma</b>  | Node Strength of the lagged phase synchronization at source level in gamma band        |
| <b>node str s-lps theta</b>  | Node Strength of the lagged phase synchronization at source level in theta band        |
| <b>relative ampl alpha</b>   | Relative spectral amplitude in alpha band                                              |
| <b>relative ampl beta</b>    | Relative spectral amplitude in beta band                                               |
| <b>relative ampl delta</b>   | Relative spectral amplitude in delta band                                              |
| <b>relative ampl gamma</b>   | Relative spectral amplitude in gamma band                                              |
| <b>relative ampl theta</b>   | Relative spectral amplitude in theta band                                              |
| <b>rqa determinism</b>       | Full-band EEG Recurrence Quantification Analysis Determinism                           |
| <b>rqa entropy</b>           | Full-band EEG Recurrence Quantification Analysis Entropy                               |
| <b>rqa laminarity</b>        | Full-band EEG Recurrence Quantification Analysis Laminarity                            |
| <b>rqa max diagonal</b>      | Full-band EEG Recurrence Quantification Analysis Maximal diagonal line length          |
| <b>rqa max vertical</b>      | Full-band EEG Recurrence Quantification Analysis Maximal vertical line length          |
| <b>rqa mean diagonal</b>     | Full-band EEG Recurrence Quantification Analysis Mean diagonal line length             |
| <b>rqa rte</b>               | Full-band EEG Recurrence Quantification Analysis Recurrence times entropy              |
| <b>rqa trapping time</b>     | Full-band EEG Recurrence Quantification Analysis Trapping time                         |
| <b>sample entropy</b>        | Full-band EEG Sample Entropy                                                           |
| <b>skewness ampl alpha</b>   | Skewness of the amplitude in alpha band                                                |
| <b>skewness ampl beta</b>    | Skewness of the amplitude in beta band                                                 |
| <b>skewness ampl delta</b>   | Skewness of the amplitude in delta band                                                |

|                               |                                                                   |
|-------------------------------|-------------------------------------------------------------------|
| <b>skewness ampl gamma</b>    | Skewness of the amplitude in gamma band                           |
| <b>skewness ampl theta</b>    | Skewness of the amplitude in theta band                           |
| <b>source ampl alpha</b>      | Spectral amplitude in alpha band at source level                  |
| <b>source ampl beta</b>       | Spectral amplitude in beta band at source level                   |
| <b>source ampl delta</b>      | Spectral amplitude in delta band at source level                  |
| <b>source ampl gamma</b>      | Spectral amplitude in gamma band at source level                  |
| <b>source ampl theta</b>      | Spectral amplitude in theta band at source level                  |
| <b>spectral entropy alpha</b> | Spectral Entropy in alpha band                                    |
| <b>spectral entropy beta</b>  | Spectral Entropy in beta band                                     |
| <b>spectral entropy delta</b> | Spectral Entropy in delta band                                    |
| <b>spectral entropy gamma</b> | Spectral Entropy in gamma band                                    |
| <b>spectral entropy theta</b> | Spectral Entropy in theta band                                    |
| <b>std ampl alpha</b>         | Standard deviation of the amplitude of the envelope in alpha band |
| <b>std ampl beta</b>          | Standard deviation of the amplitude of the envelope in beta band  |
| <b>std ampl delta</b>         | Standard deviation of the amplitude of the envelope in delta band |
| <b>std ampl gamma</b>         | Standard deviation of the amplitude of the envelope in gamma band |
| <b>std ampl theta</b>         | Standard deviation of the amplitude of the envelope in theta band |
| <b>waiting time alpha</b>     | Waiting-time statistics of alpha bursts                           |
| <b>waiting time beta</b>      | Waiting-time statistics of beta bursts                            |
| <b>waiting time delta</b>     | Waiting-time statistics of delta bursts                           |
| <b>waiting time gamma</b>     | Waiting-time statistics of gamma bursts                           |
| <b>waiting time theta</b>     | Waiting-time statistics of theta bursts                           |

Supplementary Table 2 - Prediction of SANS and SAPS scores, when using each EEG feature separately as well as all features together (last line), by Partial Least Squares Regression with leave-one-out cross-validation.

| Features                    | <i>r</i> |        | RMSE  |       | Features<br>(continued)    | <i>r</i> |        | RMSE  |       |
|-----------------------------|----------|--------|-------|-------|----------------------------|----------|--------|-------|-------|
|                             | SANS     | SAPS   | SANS  | SAPS  |                            | SANS     | SAPS   | SANS  | SAPS  |
| ampl total power<br>gamma   | 0.133    | 0.098  | 5.136 | 3.148 | lyapunov exponent          | 0.077    | 0.187  | 5.183 | 3.117 |
| ampl total power<br>theta   | 0.084    | 0.022  | 5.165 | 3.164 | mean ampl gamma            | 0.133    | 0.098  | 5.136 | 3.148 |
| asymmetry ampl<br>alpha     | 0.376    | 0.107  | 4.861 | 3.148 | mean ampl theta            | 0.084    | 0.022  | 5.165 | 3.164 |
| asymmetry ampl<br>theta     | 0.371    | 0.472  | 4.921 | 2.801 | microstates<br>temporal    | 0.063    | -0.017 | 5.185 | 3.196 |
| betw cen e-plv delta        | 0.206    | 0.287  | 5.109 | 3.040 | microstates<br>transitions | 0.207    | 0.121  | 5.067 | 3.150 |
| betw cen e-plv<br>gamma     | 0.434    | 0.357  | 4.718 | 2.948 | mod index alpha-<br>gamma  | 0.400    | 0.279  | 4.832 | 3.029 |
| betw cen s-ips beta         | 0.393    | 0.318  | 4.793 | 3.007 | mod index delta-<br>alpha  | 0.114    | 0.136  | 5.158 | 3.132 |
| betw cen s-lcoh<br>gamma    | 0.369    | 0.290  | 4.828 | 3.025 | mod index delta-<br>beta   | 0.168    | 0.308  | 5.153 | 3.031 |
| clust coeff e-icoh<br>theta | 0.122    | -0.020 | 5.140 | 3.175 | mod index delta-<br>gamma  | 0.131    | 0.292  | 5.167 | 3.016 |
| clust coeff e-plv<br>beta   | 0.301    | 0.026  | 5.037 | 3.167 | node str e-icoh<br>gamma   | 0.152    | 0.223  | 5.129 | 3.072 |
| clust coeff e-plv<br>delta  | 0.167    | 0.114  | 5.127 | 3.137 | node str e-icoh theta      | 0.120    | -0.006 | 5.165 | 3.175 |
| clust coeff e-plv<br>gamma  | 0.186    | 0.157  | 5.124 | 3.130 | node str e-plv alpha       | 0.154    | 0.013  | 5.121 | 3.166 |
| clust coeff e-plv<br>theta  | 0.083    | 0.046  | 5.172 | 3.159 | node str e-plv beta        | 0.315    | 0.091  | 4.987 | 3.154 |
| clust coeff s-ips<br>theta  | 0.297    | 0.106  | 4.959 | 3.144 | node str e-plv delta       | 0.191    | 0.153  | 5.111 | 3.119 |
| clust coeff s-lcoh<br>theta | 0.004    | -0.020 | 5.216 | 3.174 | node str e-plv<br>gamma    | 0.211    | 0.188  | 5.096 | 3.103 |
| clust coeff s-lps<br>gamma  | 0.006    | 0.232  | 5.226 | 3.076 | node str e-plv theta       | 0.166    | 0.106  | 5.121 | 3.139 |
| clust coeff s-lps<br>theta  | 0.065    | -0.001 | 5.190 | 3.174 | node str s-ips alpha       | 0.189    | 0.188  | 5.110 | 3.099 |
| coeff of var ampl<br>alpha  | 0.376    | 0.062  | 4.798 | 3.174 | node str s-ips theta       | 0.243    | 0.130  | 5.022 | 3.138 |
| coeff of var ampl<br>beta   | 0.081    | 0.248  | 5.176 | 3.060 | node str s-lcoh<br>gamma   | 0.112    | 0.242  | 5.171 | 3.073 |



|                            |        |       |       |       |                           |        |       |       |       |
|----------------------------|--------|-------|-------|-------|---------------------------|--------|-------|-------|-------|
| coeff of var ampl<br>theta | 0.044  | 0.197 | 5.204 | 3.091 | node str s-lcoh theta     | 0.050  | 0.077 | 5.202 | 3.158 |
| dfa exponent alpha         | -0.060 | 0.019 | 5.231 | 3.171 | node str s-lps gamma      | 0.065  | 0.169 | 5.216 | 3.115 |
| dfa exponent beta          | 0.059  | 0.070 | 5.201 | 3.155 | node str s-lps theta      | 0.106  | 0.052 | 5.174 | 3.165 |
| hfd alpha                  | 0.050  | 0.056 | 5.191 | 3.148 | relative ampl beta        | 0.041  | 0.201 | 5.195 | 3.097 |
| hfd beta                   | 0.055  | 0.084 | 5.194 | 3.150 | relative ampl theta       | -0.057 | 0.123 | 5.229 | 3.131 |
| hfd delta                  | 0.046  | 0.337 | 5.194 | 2.984 | skewness ampl beta        | 0.260  | 0.238 | 5.024 | 3.066 |
| hfd theta                  | 0.378  | 0.087 | 4.798 | 3.139 | skewness ampl theta       | 0.128  | 0.179 | 5.151 | 3.106 |
| hurst exponent             | 0.065  | 0.117 | 5.187 | 3.137 | spectral entropy<br>alpha | 0.344  | 0.149 | 4.950 | 3.130 |
| kfd delta                  | 0.141  | 0.118 | 5.130 | 3.140 | spectral entropy<br>delta | 0.248  | 0.155 | 5.049 | 3.118 |
| kfd gamma                  | 0.140  | 0.183 | 5.135 | 3.102 | spectral entropy<br>gamma | 0.083  | 0.174 | 5.176 | 3.106 |
| kfd theta                  | 0.097  | 0.422 | 5.146 | 2.868 | spectral entropy<br>theta | 0.047  | 0.129 | 5.202 | 3.130 |
| kurtosis ampl alpha        | 0.113  | 0.094 | 5.156 | 3.142 | std ampl gamma            | 0.174  | 0.090 | 5.100 | 3.152 |
| kurtosis ampl<br>gamma     | 0.264  | 0.149 | 5.017 | 3.162 | std ampl theta            | 0.131  | 0.025 | 5.127 | 3.162 |
| kurtosis ampl theta        | 0.175  | 0.333 | 5.100 | 2.984 | waiting time beta         | 0.081  | 0.122 | 5.184 | 3.151 |
| life time beta             | 0.141  | 0.060 | 5.144 | 3.168 | waiting time gamma        | 0.301  | 0.097 | 4.939 | 3.142 |
| life time gamma            | 0.295  | 0.097 | 4.958 | 3.142 | All Features              | 0.837  | 0.832 | 2.835 | 1.752 |

Supplementary Table 3 - Number of components and number of variables used for the prediction of SANS and SAPS scores, when using each EEG feature separately as well as features together (last line), by Partial Least Squares Regression.

| Features                 | Number of Components |      | Number of Variables |      | Features<br>(continued) | Number of Components |      | Number of Variables |      |
|--------------------------|----------------------|------|---------------------|------|-------------------------|----------------------|------|---------------------|------|
|                          | SANS                 | SAPS | SANS                | SAPS |                         | SANS                 | SAPS | SANS                | SAPS |
| ampl total power gamma   | 1                    | 1    | 2                   | 5    | lyapunov exponent       | 1                    | 1    | 2                   | 8    |
| ampl total power theta   | 1                    | 1    | 40                  | 2    | mean ampl gamma         | 1                    | 1    | 2                   | 5    |
| asymmetry ampl alpha     | 2                    | 1    | 29                  | 3    | mean ampl theta         | 1                    | 1    | 40                  | 2    |
| asymmetry ampl theta     | 2                    | 2    | 26                  | 21   | microstates temporal    | 1                    | 2    | 2                   | 4    |
| betw cen e-plv delta     | 1                    | 1    | 8                   | 7    | microstates transitions | 1                    | 2    | 2                   | 6    |
| betw cen e-plv gamma     | 2                    | 1    | 23                  | 5    | mod index alpha-gamma   | 3                    | 1    | 18                  | 4    |
| betw cen s-ips beta      | 1                    | 1    | 12                  | 10   | mod index delta-alpha   | 1                    | 1    | 3                   | 27   |
| betw cen s-lcoh gamma    | 1                    | 1    | 9                   | 6    | mod index delta-beta    | 1                    | 2    | 6                   | 24   |
| clust coeff e-icoh theta | 1                    | 1    | 10                  | 2    | mod index delta-gamma   | 1                    | 1    | 3                   | 3    |
| clust coeff e-plv beta   | 4                    | 1    | 14                  | 13   | node str e-icoh gamma   | 1                    | 1    | 3                   | 2    |
| clust coeff e-plv delta  | 2                    | 1    | 4                   | 4    | node str e-icoh theta   | 1                    | 1    | 11                  | 2    |
| clust coeff e-plv gamma  | 2                    | 1    | 24                  | 2    | node str e-plv alpha    | 1                    | 1    | 2                   | 64   |
| clust coeff e-plv theta  | 1                    | 1    | 5                   | 2    | node str e-plv beta     | 4                    | 1    | 11                  | 3    |
| clust coeff s-ips theta  | 2                    | 1    | 5                   | 5    | node str e-plv delta    | 2                    | 1    | 4                   | 4    |
| clust coeff s-lcoh theta | 1                    | 1    | 3                   | 4    | node str e-plv gamma    | 2                    | 1    | 5                   | 2    |
| clust coeff s-lps gamma  | 1                    | 2    | 3                   | 50   | node str e-plv theta    | 1                    | 1    | 3                   | 3    |
| clust coeff s-lps theta  | 1                    | 1    | 2                   | 2    | node str s-ips alpha    | 1                    | 1    | 3                   | 6    |
| coeff of var ampl alpha  | 2                    | 1    | 11                  | 10   | node str s-ips theta    | 1                    | 1    | 3                   | 6    |
| coeff of var ampl beta   | 1                    | 1    | 2                   | 5    | node str s-lcoh gamma   | 1                    | 2    | 2                   | 42   |

|                            |   |   |    |    |                           |   |   |     |     |
|----------------------------|---|---|----|----|---------------------------|---|---|-----|-----|
| coeff of var ampl<br>theta | 1 | 1 | 2  | 2  | node str s-lcoh<br>theta  | 1 | 1 | 4   | 4   |
| dfa exponent<br>alpha      | 1 | 1 | 2  | 54 | node str s-lps<br>gamma   | 1 | 1 | 2   | 7   |
| dfa exponent beta          | 1 | 1 | 6  | 2  | node str s-lps theta      | 1 | 1 | 2   | 2   |
| hfd alpha                  | 1 | 1 | 2  | 37 | relative ampl beta        | 1 | 2 | 4   | 9   |
| hfd beta                   | 1 | 1 | 2  | 2  | relative ampl theta       | 1 | 1 | 2   | 2   |
| hfd delta                  | 1 | 2 | 2  | 16 | skewness ampl<br>beta     | 1 | 1 | 6   | 4   |
| hfd theta                  | 3 | 1 | 5  | 24 | skewness ampl<br>theta    | 1 | 1 | 11  | 7   |
| hurst exponent             | 1 | 1 | 6  | 6  | spectral entropy<br>alpha | 5 | 2 | 23  | 3   |
| kfd delta                  | 1 | 1 | 2  | 11 | spectral entropy<br>delta | 2 | 1 | 19  | 2   |
| kfd gamma                  | 1 | 1 | 6  | 2  | spectral entropy<br>gamma | 1 | 1 | 2   | 3   |
| kfd theta                  | 1 | 4 | 53 | 7  | spectral entropy<br>theta | 1 | 1 | 6   | 3   |
| kurtosis ampl<br>alpha     | 1 | 1 | 2  | 13 | std ampl gamma            | 1 | 1 | 8   | 5   |
| kurtosis ampl<br>gamma     | 2 | 1 | 14 | 2  | std ampl theta            | 1 | 1 | 50  | 4   |
| kurtosis ampl<br>theta     | 1 | 1 | 2  | 7  | waiting time beta         | 1 | 1 | 2   | 5   |
| life time beta             | 1 | 1 | 11 | 3  | waiting time<br>gamma     | 2 | 1 | 12  | 3   |
| life time gamma            | 2 | 1 | 9  | 9  | All Features              | 4 | 6 | 185 | 196 |

## 2. Supplementary Methods

### EEG Data Pre-Processing

Offline EEG data were downsampled to 256 Hz (128 Hz for the microstates analysis) and preprocessed using an automatic pipeline (APP; da Cruz et al., 2018). APP included the following steps: filtering via a bandpass filter of 1-100 Hz (1-40 Hz for the microstates analysis); removal of line-noise (CleanLine; [www.nitrc.org/projects/cleanline](http://www.nitrc.org/projects/cleanline)); re-referencing to the bi-weight estimate of the mean of all electrodes; removal and 3D spline interpolation of bad electrodes; removal of bad epochs; independent component analysis to remove artifacts related to eye movements, muscle activity and bad electrodes (not conducted for the connectivity analysis); and re-referencing to the common average.

### Time-Domain Amplitude Features

The most straight forward analysis of EEG signals is the quantification of its time-domain amplitude features. For that, we first filtered the EEG signal of each channel into five frequency bands (delta (1 - 4 Hz), theta (4 - 8 Hz), alpha (8 - 13 Hz), beta (13 - 30 Hz), gamma (30 - 70 Hz)). Then, for each frequency band, we computed several amplitude features: total power, mean of the envelope, standard deviation of the envelope, skewness of the signal amplitude, and kurtosis of the signal amplitude. The EEG signal was divided into 4-second epochs and the features were calculated for each epoch. Then the mean across epochs is used for group comparisons and main analyses.

#### Amplitude Total Power

If  $y(t)$  is the time domain EEG signal of a given channel at time  $t$ , the amplitude total power is given by

$$Total\ Power = \frac{1}{T} \sum_{t=1}^T |y(t)|^2$$

where  $T$  is the total time.

#### Mean and Standard Deviation of the Envelope

If  $\mathcal{H}(y(t))$  is the Hilbert transform of the time domain EEG signal  $y(t)$ , then the envelope of the signal is given by

$$Envelope(t) = |\mathcal{H}(y(t))|^2$$

and the measures of centrality and variability are given by the mean and standard deviation of the envelope.

#### Skewness and Kurtosis of the Signal

If  $\bar{y}$  and  $y_{SD}$  are the mean and standard deviation of the EEG signal  $y(t)$ , respectively, then the skewness of the signal is given by

$$Skewness = \frac{\frac{1}{T} \sum_{t=1}^T |y(t) - \bar{y}|^3}{y_{SD}^3}$$

and the kurtosis of the signal is given by

$$Kurtosis = \frac{\frac{1}{T} \sum_{t=1}^T |y(t) - \bar{y}|^4}{y_{SD}^4}$$

## Range EEG

### Similar to EEG Data Pre-Processing

Offline EEG data were downsampled to 256 Hz (128 Hz for the microstates analysis) and preprocessed using an automatic pipeline (APP; da Cruz et al., 2018). APP included the following steps: filtering via a bandpass filter of 1-100 Hz (1-40 Hz for the microstates analysis); removal of line-noise (CleanLine; [www.nitrc.org/projects/cleanline](http://www.nitrc.org/projects/cleanline)); re-referencing to the bi-weight estimate of the mean of all electrodes; removal and 3D spline interpolation of bad electrodes; removal of bad epochs; independent component analysis to remove artifacts related to eye movements, muscle activity and bad electrodes (not conducted for the connectivity analysis); and re-referencing to the common average.

Time-Domain Amplitude Features, range EEG was introduced as a way to quantify the amplitude of the EEG data (O'Reilly et al., 2012). However, unlike the previously described features, range EEG focuses on a peak-to-peak measure of the EEG amplitude. Here, before calculating the range EEG features, we first filtered the EEG signal of each channel into five frequency bands (delta, theta, alpha, beta, gamma). Then, for each frequency band, we calculated the range EEG and two of its features: coefficient of variation and asymmetry. If  $y(t)$  is the EEG signal, then over a time segment  $s$  the difference between the maximum and the minimum is given by

$$diff(s) = \max(y(t)w(t - s\Delta)) - \min(y(t)w(t - s\Delta))$$

where  $w(t)$  is a window (here, a 4-second Hanning window) and  $\Delta$  is a time-shift factor related to the percentage of overlap (here, we used 50%). Then, the range EEG is given by

$$rEEG(s) = \begin{cases} \frac{50}{\log 50} \log(diff(s)) & \text{if } diff(s) > 50 \\ diff(s) & \text{otherwise} \end{cases}$$

### Coefficient of variation

If  $\overline{rEEG}$  is the mean range EEG and  $rEEG_{SD}$  is the standard deviation of the range EEG, the coefficient of variation of the range EEG ( $rEEG_{CV}$ ) is given by

$$rEEG_{CV} = \frac{rEEG_{SD}}{rEEG}$$

### Asymmetry

If  $rEEG_{median}$ ,  $rEEG_{5\%}$ , and  $rEEG_{95\%}$  are the median, 5 and 95 percentile of the range EEG, respectively, and we let  $A = rEEG_{median} - rEEG_{5\%}$  and  $B = rEEG_{95\%} - rEEG_{median}$ , then the range EEG asymmetry is given by

$$rEEG_{asymmetry} = \frac{B - A}{A + B}$$

The  $rEEG_{asymmetry}$  ranges from -1 to 1, with values close to 0 representing symmetry and values close to -1 and 1 indicating asymmetry of the range EEG.

### Hjorth Parameters

Hjorth parameters are descriptive statistical properties of the EEG time-domain signal and provide a bridge between time and frequency domain interpretation of the EEG signal (Hjorth, 1970). There are 3 Hjorth parameters: Activity, Mobility, and Complexity. The EEG signal was divided into 4-second epochs and the 3 Hjorth parameters were calculated for each epoch. Then, for each parameter, the mean across epochs was used for group comparisons and main analyses.

#### Activity

The Activity parameter quantifies the power of the signal. If  $y(t)$  is the time domain EEG signal of a given channel, then Activity is the variance of the signal ( $var(y(t))$ ).

#### Mobility

The Mobility parameter is an approximation of the mean frequency of the signal and is computed as

$$Mobility = \sqrt{\frac{var\left(\frac{dy(t)}{dt}\right)}{var(y(t))}}$$

where  $dy(t)/dt$  is the first derivative of the signal with respect to time.

#### Complexity

The Complexity parameter is sensitive to changes in the frequency of the signal as it quantifies the deviations from a pure sinusoidal signal. It is computed as

$$Complexity = \frac{Mobility\left(\frac{dy(t)}{dt}\right)}{Mobility(y(t))}$$

## Relative Spectral Amplitude

Fourier analysis is the most common method to decompose an EEG time series into frequency components. The analysis of the amplitude spectrum gives us the magnitude of the Fourier coefficients at different frequencies. It is thought that activity in high frequencies reflects processing within brain areas and activity in low frequencies is thought to reflect communication between brain areas (Uhlhaas & Singer, 2010; von Stein & Sarnthein, 2000). Here, for each of the 5 frequency bands (delta, theta, alpha, beta, and gamma), we computed their relative spectral amplitude. If  $Y(f)$  is the spectral amplitude of the Fourier transform of the EEG signal  $y(t)$  at frequency  $f$ , then, the relative amplitude for each frequency band is given by

$$\text{Relative Amplitude}(f_i, f_j) = \frac{\sum_{k=f_i}^{f_j} Y(k) / f_j - f_i}{\sum_{k=f_a}^{f_z} Y(k) / f_z - f_a}$$

where  $f_i$  and  $f_f$  are the boundaries of the frequency band of interest (e.g., for delta band,  $f_i$  and  $f_f$  are 1 and 4 Hz, respectively) and  $f_a$  and  $f_z$  are the boundaries of all the frequencies considered. Here,  $f_a$  and  $f_z$  are 1 and 70 Hz, respectively. For each of the 5 frequency bands, the relative amplitude was computed for non-overlapping windows of 4 seconds. Then for each frequency band the mean across windows was used for group comparisons and main analyses.

## Source Spectral Amplitude

Besides quantifying the spectral amplitude in the electrode space, we also quantified the spectral amplitude in the source space. The three-dimensional cortical current source densities were computed using the software LORETA (Pascual-Marqui et al., 2011). First, the EEG data of each electrode is converted to the frequency domain using the Fourier transform and the cross-spectrum is obtained for each time epoch. Then, the cortical activity was reconstructed from the scalp signals, using the exact low-resolution electromagnetic tomography (eLORETA) algorithm to a space of 6239 gray matter voxels as implemented in LORETA. We defined 80 regions of interest (ROI; 40 per hemisphere) from the Automated Anatomical Labelling (AAL) atlas, similar to a previous schizophrenia EEG study (Andreou et al., 2015). We defined 5 frequency bands of interest (delta, theta, alpha, beta and gamma) and, for each frequency band, we computed the average current source densities for the 80 ROIs from the eLORETA solution space.

## Modulation Index

Low-frequency brain oscillations exert a modulatory effect on high-frequency activity, potentially, allowing optimal coordination between large-scale networks and more local functional brain sub-systems (Canolty & Knight, 2010). Such cross-frequency interactions may occur via phase-amplitude coupling (PAC) and can be quantified using a modulation index (Tort et al., 2010). First, the phase and amplitude values are obtained from the band-pass filtered signals,  $f_p$  and  $f_A$  respectively, using Hilbert transform. Then, all

the instantaneous phases from -180 to 180 corresponding to  $f_p$  are binned into 18 values. The bins take a mean amplitude value  $\bar{a}$  and a vector of normalized amplitude values is defined as  $P$  given by

$$P(i) = \frac{\bar{a}}{\sum_{i=1}^N \bar{a}_i}$$

where  $N$  is 18. If there is no effect of the phase of  $f_p$  on  $f_A$ , the values of  $P$  would be roughly uniformly distributed. MI calculates the deviation of  $P$  from a uniform distribution using Kullback-Leibler (KL) divergence, which provides a value on how similar two distributions are. KL divergence is defined as

$$KL(U, X) = \ln(N) - H(P)$$

where  $H(P)$  is the Shannon's information entropy given by

$$H(P) = - \sum_{i=1}^N P(i) \ln P(i)$$

Finally, the modulation index (MI) is defined as

$$MI = \frac{KL(U, X)}{\ln(N)}$$

Before estimating the MI, we segmented the continuous EEG signals into non-overlapping 4-second segments. The mean MI across non-overlapping segments is used for group comparisons and main analyses. We quantified 8 modulation indexes corresponding to: delta phase-alpha amplitude, delta phase-beta amplitude, delta phase-gamma amplitude, theta phase-alpha amplitude, theta phase-beta amplitude, theta phase-gamma amplitude, alpha phase-beta amplitude, alpha phase-gamma amplitude, and beta phase-gamma amplitude.

## Fractal Dimension

Fractal dimension (FD) of a signal is a measure of the signal's irregularity and self-similarity in the time domain. It is different from the dimension of an attractor which is calculated in a phase-space. For EEG signals, FD values lie between 1 and 2, with high values associated with higher self-similarity (Eke et al., 2002). Here, we first filtered the EEG signal of each channel into the 5 frequency bands and for each frequency band we computed two FD: Katz's Fractal Dimension, and Higuchi's Fractal Dimension. The EEG signal was divided into 4 seconds epochs and the features were calculated for each epoch. Then, for each method, the mean across epochs was used for group comparisons and main analyses.

### Katz's Fractal Dimension

Katz's method for FD (KFD) calculation is derived from the EEG time series by computing the sum ( $L$ ) as well as the average ( $a$ ) of the Euclidean distances between successive points of the sequence, and the maximum distance between the first point and all other points of the sequence ( $d$ ) (Katz, 1988). Then the KFD is given by



$$KFD = \frac{\log(L/a)}{\log(d/a)}$$

### Higuchi's Fractal Dimension

Higuchi's method for FD (HFD) calculation is derived from the EEG time series  $y(t)$  by first deriving  $k$  new subsample sets ( $y_k$ ) (Higuchi, 1988). Then the length of each  $y_k$  ( $L_m$ ) is given by

$$L_m(k) = \frac{1}{k} \left( \frac{T-1}{Mk} \sum_{i=1}^M |y(m+ik) - y(m+(i-1)k)| \right)$$

where  $m = 1, 2, \dots, k$ ,  $T$  is the total number of samples, and  $M = (T - m)/k$ . The length of the signal is given by

$$L(k) = \sum_{m=1}^k L_m(k)$$

and it is proportional to  $k^{-D}$ , where  $D$  is the fractal dimension. Finally,  $L(k)$  is plotted against  $k$  ( $k = 1, 2, \dots, k_{max}$ ; here,  $k_{max} = 25$ ) on a double logarithm scale. The data should fall on a straight line, with the slope equal to the FD of  $y(t)$ .

### Hurst Exponent

The Hurst Exponent was introduced by Harold Hurst as a measure of the long-term memory of a time series (Hurst, 1957). Hurst exponent ranges from 0 to 1. Values larger than 0.5 suggest long-term positive autocorrelation, values smaller than 0.5 indicate anti-persistent behavior, while a Hurst exponent of 0.5 suggests that the time-series is truly random. EEG time series tend to have Hurst exponents around 0.7 (Vorobyov & Cichocki, 2002).

For a time series  $y(t)$ , with  $T$  samples, we can calculate a cumulative deviate series as

$$Y(t, T) = \sum_{t=1}^T y(t) - \bar{y}$$

where  $\bar{y}$  is the mean  $T$  samples. Then the range of the accumulated values is given by

$$R = \max_{1 \leq t \leq T} (Y(t, T)) - \min_{1 \leq t \leq T} (Y(t, T))$$

If  $S$  is the standard deviation of the time series  $y(t)$ , the Hurst exponent  $H$  is related to the ratio  $R/S$  by

$$\frac{R}{S} = (cT)^H$$

where  $c$  is a constant (usually set to 0.5).

Here, we divided the EEG signal of each channel into 4-second epochs and used the code provided by (Davidson, 2006) to estimate the full band Hurst exponent. Then the mean across epochs was used for group comparisons and main analyses.

## Detrended Fluctuation Analysis

Detrended fluctuation analysis (DFA) provides a suitable framework to analyze long-range ( $> 1s$ ) temporal autocorrelations and the scaling behavior of brain oscillations (Hardstone et al., 2012). DFA is performed on the amplitude envelopes of band-pass filtered EEG time series. Here, we performed the DFA for the 5 frequency bands. The cumulative of the amplitude envelope is calculated as

$$Y(t) = \sum_{t'=1}^T A(t')$$

where  $A(t)$  is the amplitude envelope, obtained using Hilbert transform. The integrated signal is subsequently split into 20 sets of 50% percent overlapping windows with sizes varying from 1 to 25 seconds. The windows were equidistant according to a logarithmic scale. The signals in each window are detrended using a least-squares fit and the fluctuation function is obtained. The fluctuation function is expressed as

$$F^2(\tau) = \frac{1}{N} \sum_{t=1}^T [Y(t) - Y_{\tau}(t)]^2$$

where  $\tau$  is the window size of the subset defined initially, and  $N$  is the number of samples corresponding to the window size. The square-root of the fluctuation functions for each window are plotted on log-log axes with respect to the window sizes and a line is fitted to the data. The slope of the fitted line provides the DFA exponent which quantifies long-range temporal correlations ( $< 0.5$ : anti-correlated;  $\sim 0.5$ : uncorrelated;  $> 0.5$ : correlated;  $\sim 1$ : pink noise;  $> 1$ : non-stationary).

## Life and Waiting Times

The structure of brain oscillations in short-to-mid temporal scales ( $< 1s$ ) is estimated using life-and waiting-times (Montez et al., 2009). The analysis is performed on the instantaneous amplitude of the band-pass filtered signals, obtained using Hilbert transform. Here, we calculated the life and waiting times for the 5 frequency bands. The median of the amplitude envelope is set as a threshold, which allows

identifying the onset and end of a burst. The time during which the amplitudes exceed or stay below the threshold is defined as life or waiting time respectively. The statistics of interest are the 95<sup>th</sup> percentiles of the empirical cumulative distributions of the life or waiting times.

## Entropy in the Time-Domain

Entropy, in the sense of dynamical systems, provides a powerful approach to understanding biological systems by quantifying the amount of information contained in a time series like EEG. Here, we used two common ways to quantify the entropy of the time-domain of EEG signals: approximate entropy (Pincus et al., 1991) and sample entropy (Richman & Moorman, 2000). First we split the EEG data into non-overlapping 4-second epochs and for each epoch we estimated the embedding dimension  $m$  and the lag  $\tau$ , using the delay embedding theorem (Takens, 1981) as implemented in the *phaseSpaceRecons* function of the Predictive Maintenance MATLAB Toolbox. Then, we estimated the approximate and sample entropy for each epoch and take the mean across epochs for the main analyses. Small values of approximate and sample entropy reflect repeatability of the signal and high values indicate irregularity.

### Approximate Entropy

If  $y(t)$  is the EEG time series with length  $T$ ,  $m$  is the embedding dimension, and  $r$  the radius of similarity (here, we set  $r = 0.2 \times std(y(t))$ ), then we can embed the signal in blocks  $Y_m(i) = \{y(i), y(i+1), \dots, y(i+m-1)\}$  and  $Y_m(j) = \{y(j), y(j+1), \dots, y(j+m-1)\}$ . The distance between  $Y_m(i)$  and  $Y_m(j)$  is given by

$$d[Y_m(i), Y_m(j)] = \max_{k=1,2,\dots,m} (|y(i+k-1) - y(j+k-1)|)$$

If we let  $N(i)$  be the number of within range points, at point  $i$ , given by

$$N(i) = \sum_{i=1, i \neq j}^T \mathbf{1}(d[Y_m(i), Y_m(j)] < r)$$

where  $\mathbf{1}$  is the indicator operator, and let  $C_m(i) = N(i)/(T - m + 1)$ , we can compute the average logarithm of  $C_m(i)$  as

$$\Psi(m) = \frac{1}{T - m + 1} \sum_{j=1}^{T-m+1} \log(C_m(i))$$

Then, the approximate entropy is given by

$$ApEn = \Psi(m) - \Psi(m+1)$$

## Sample Entropy

Sample entropy was introduced by Richman and Moorman as a measure of complexity, which contrary to approximate entropy, does not include self-similarity patterns (Richman & Moorman, 2000). Similar to approximate entropy, if we have embedded times series in blocks with  $m$  dimensions ( $Y_m(i), Y_m(j)$ ) as well as with  $m + 1$  dimensions ( $Y_{m+1}(i), Y_{m+1}(j)$ ), we calculate  $A$  = the number of template vectors having  $d[Y_m(i), Y_m(j)] < r$  and  $B$  = the number of template vectors having  $d[Y_{m+1}(i), Y_{m+1}(j)] < r$ . Then, the sample entropy can be calculated as

$$SampEn = -\log\left(\frac{A}{B}\right)$$

## Spectral Entropy

Besides time-domain, entropy can also be calculated in the spectral domain as a measure of information of a signal. Spectral entropy quantifies the irregularity of the EEG signal, i.e., the peakedness, or flatness of the EEG power spectrum (Inouye et al., 1991). Here, for each of the 5 frequency bands (delta, theta, alpha, beta, and gamma), we computed their spectral entropy for non-overlapping windows of 4 seconds. Then the mean across windows is used for group comparisons and main analyses

For the spectral entropy calculation, we first calculated the power spectral density ( $PSD$ ) via Fourier transform. Then, given two frequencies of interest  $f_i$  and  $f_f$  (i.e., the boundaries of a frequency band of interest; for delta band, for example,  $f_i$  and  $f_f$  are 1 and 4 Hz, respectively), the  $PSD$  between these two frequencies is normalized ( $PSD_n$ ) by the total energy in the EEG segment. Finally, the spectral entropy is calculated using the Shannon Entropy as

$$SE(f_i, f_f) = - \sum_{f=f_i}^{f_f} PSD_n(f) \log(PSD_n(f))$$

## Complexity

EEG exhibits complex nonlinear behavior with nonlinear dynamical properties. This complexity should not be seen as randomness but as an intermediate condition between randomness and order (Stam, 2005). High values of complexity are associated with highly distributed and desynchronized neural generators of the EEG signal, while low values of complexity are associated with local and synchronized generators (Ibáñez-Molina et al., 2018). Here, we computed three estimates of the complexity of the EEG signal: Lempel-Ziv complexity (which is based on algorithmic complexity), Lyapunov Exponent, and Correlation Dimension (which are chaos-based estimates of complexity). The EEG signal was divided into 4-second epochs and the features were calculated for each epoch. Then the mean across epochs is used for group comparisons and main analyses.

### Lempel-Ziv Complexity

Lempel-Ziv Complexity (LZC) was introduced as a measure of complexity of finite sequences and is related to the number of steps by which a given sequence is presumed to be generated (Lempel & Ziv, 1976). In essence, given a string (in our case an EEG signal), LZC estimates the number of bits of the shortest computer that can generate the string. The first step of the LZC computation is to transform the EEG signal ( $y(t)$ ) into a binary sequence  $P = s(1), s(2), \dots, s(n)$ , by thresholding the signal based on the median ( $y_{median}$ ):

$$s(i) = \begin{cases} 0 & \text{if } y(i) < y_{median} \\ 1 & \text{if } y(i) > y_{median} \end{cases}$$

Then the sequence  $P$  is scanned from left to right and every time that a new sequence of consecutive numbers is found one unit is added to a complexity counter ( $C(n)$ ). Finally, the complexity counter is normalized by the length of the sequence  $P$  ( $L$ ) and the LZC is given by

$$LZC = \frac{C(n)}{L/\log_2(L)}$$

Here, we used the code provide by Thai (2019), to estimate the LZC based on the decomposition of the sequence  $P$  into an exhaustive and a primitive production process. The exhaustive LZC and the primitive LZC can be seen as lower and upper limit of the complexity, respectively.

#### Lyapunov Exponent

The complexity of an EEG time series  $y(t)$  can be considered a chaotic phenomenon (Stam, 2005). One of the most important properties of a chaotic system is its sensitive dependence on initial conditions. Lyapunov exponents can be used to quantify how a slight perturbation in the initial conditions can cause divergent trajectories in a system. Given two phase space trajectories with initial separation vector  $\delta\mathbf{y}_0$ , the rate at which these two trajectories diverge can be estimated by

$$|\delta\mathbf{y}(t)| \approx e^{\lambda t} |\delta\mathbf{y}_0|$$

where  $\lambda$  is the Lyapunov exponent. Because the rate of divergence can be different for different orientations of the initial separation vector, it is common to refer to the Largest Lyapunov exponent (LLE) since it characterizes the stability of a system (positive LLE is unstable and negative LLE is stable). Here, we used the code provided by Mohammadi (2009) to estimate the LLE of the EEG signal. The code is based on Rosenstein's method to estimate the LLE (Rosenstein et al., 1993) and uses the False Nearest Neighbors and the Symplectic Geometry methods to choose the embedding dimension  $m$  (Hegger & Kantz, 1999; Lei et al., 2002).

#### Correlation Dimension

As a measure of chaotic signal complexity, Correlation Dimension ( $D_2$ ) can be seen as the number of independent variables or degrees of freedom that describe the behavior of a dynamic system (Stam, 2005). In the EEG literature,  $D_2$  is often interpreted as a proxy of the integration of information in the

brain. To estimate  $D_2$ , we first estimated the embedding dimension  $m$  and the lag  $\tau$  of the EEG time series  $y(t)$  with length  $T$  using the delay embedding theorem (Takens, 1981) as implemented in the *phaseSpaceRecons* function of the Predictive Maintenance MATLAB Toolbox. Second, we embedded the signal in blocks  $Y_m(i) = \{y(i), y(i+1), \dots, y(i+m-1)\}$  and  $Y_m(j) = \{y(j), y(j+1), \dots, y(j+m-1)\}$ . The distance between  $Y_m(i)$  and  $Y_m(j)$  is given by

$$d[Y_m(i), Y_m(j)] = \max_{k=1,2,\dots,m} (|y(i+k-1) - y(j+k-1)|)$$

Then we calculated the number of within range points, at point  $i$  ( $N_i(R)$ ), as

$$N_i(R) = \sum_{j=1, j \neq i}^T \mathbf{1}(d[Y_m(i), Y_m(j)] < R)$$

where  $\mathbf{1}$  is the indicator operator and  $R$  is the radius of similarity (we used Matlab's function *correlationDimension* default value). Finally, the correlation integral  $C(R)$  is given by

$$C(R) = \frac{2}{T(T-1)} \sum_{i=1}^T N_i(R)$$

and  $D_2$  is the slope of  $C(R)$  vs.  $R$ .

## Recurrence Quantification Analysis

Recurrence plots (RPs) and recurrence quantification analysis (RQA) are nonlinear methods that permit to explore several aspects of the dynamics of complex systems, such as EEG signals, in a reconstructed phase space (Eckmann et al., 1987; N Marwan et al., 2007). Mathematically, the RPs are expressed as

$$R_{i,j}(\varepsilon) = \Theta(\varepsilon - \|\vec{y}_i - \vec{y}_j\|), \quad i, j = 1, \dots, N$$

where  $\vec{y}_i$  is the phase space reconstruction of the time series  $y(t)$ ,  $\Theta$  corresponds to the Heaviside function,  $\|\cdot\|$  to the Euclidean norm, and  $\varepsilon$  to the recurrence threshold. If the system is close enough (determined by  $\varepsilon$ ) to a previously visited state, a 1 will be assigned to the RP in the corresponding  $(i, j)$  coordinates, a value of 0 otherwise. The structures of the RP are quantified using RQA complexity measures. To build the recurrence plots, continuous EEG signals were split into non-overlapping 4-second segments. For each segment, a phase space is reconstructed using the delay embedding theorem (Takens, 1981) as implemented in the function *phaseSpaceRecons* of the Predictive Maintenance MATLAB Toolbox. We extracted 8 different measures from the recurrence matrix using the CRP Toolbox for MATLAB (Marwan, 2017) and used the mean across segments group comparisons and main analyses. The recurrence threshold is set for each EEG channel at each time-window as the 10<sup>th</sup> percentile of the distribution of distances.

## Determinism

If the trajectory of a system is similar at different moments in time, the RP will produce diagonal lines parallel to the main diagonal. Determinism quantifies the proportion of recurrence points (denoted as “1” in the recurrence matrix) that form diagonal lines and is defined as

$$DET = \frac{\sum_{l=l_{min}}^N l P(l)}{\sum_{l=1}^N l P(l)}$$

where  $P(l)$  indicates a distribution of diagonal lines. We set  $l_{min}$  to 2.

### Entropy

The complexity of the distribution of diagonal lines can be quantified using Shannon’s information entropy

$$ENTR = - \sum_{l=l_{min}}^N p(l) \ln p(l)$$

where  $p(l) = P(l)/N_l$  indicates the probability of finding a diagonal line of a given length  $l$ . If the system shows periodicity, the value of entropy will be low.

### Laminarity

If a system evolves subtly, or if it is “trapped” in a state, the recurrence plot will reflect vertical structures. Laminarity quantifies the proportion of recurrence points forming vertical lines and is defined as

$$LAM = \frac{\sum_{v=v_{min}}^N v P(v)}{\sum_{v=1}^N v P(v)}$$

where  $P(v)$  denotes the distribution of all vertical lines that exceed two points ( $v_{min} = 2$ ).

### Maximal Diagonal Line Length

The maximal diagonal line length of the distribution of diagonal lines is defines as

$$L_{max} = \max(\{l_i\}_{i=1}^{N_l})$$

where  $N_l$  indicates the total number of vertical lines. The inverse of  $L_{max}$  is related to the divergence of the system.

### Maximal Vertical Line Length

The utility of the vertical structures in the recurrence plots is mainly related to the detection of chaos-chaos transitions (Marwan et al., 2002). The maximal length of vertical lines is also a recurrence statistic of interest and is expressed as

$$V_{max} = \max(\{v_i\}_{i=1}^{N_v})$$

where  $N_v$  indicates the total number of vertical lines.

### Mean Diagonal Line Length

Given the nature of diagonal structures on recurrence plots, the mean length of diagonal lines provides a value for the predictability of the system. It is formulated as

$$L = \frac{\sum_{l=l_{min}}^N l P(l)}{\sum_{l=l_{min}}^N P(l)}$$

where  $P(l)$  indicates a distribution of diagonal lines.

### Recurrence Times Entropy

Recurrence times entropy (RTE) denotes the entropy of the frequency distribution of vertical “white” or not-recurrent segments, which provide information about the time that it takes for the system to return to previously visited states. The entropy of recurrence times is thus formulated as

$$RTE = -\frac{1}{\ln(T_{max})} \sum_{tw=1}^{T_{max}} p(tw) \ln p(tw)$$

where  $T_{max}$  is the maximum white vertical line length, and  $p(tw)$  is the probability of finding a white segment of length  $tw$ .

### Trapping Time

The mean vertical line length, also denoted in the literature as trapping time is formulated as

$$TT = \frac{\sum_{v=v_{min}}^N v P(v)}{\sum_{v=v_{min}}^N P(v)}$$

where  $P(v)$  indicates the distribution of vertical lines. Trapping time provides information on the average time during which the system does not evolve significantly or stays within the limits of the recurrence neighborhood. Similar to the case of Laminarity, we set  $v_{min} = 2$ .

### Microstates Analysis

EEG microstates are on-going scalp potential topographies that remain stable for around 60 to 120 ms before changing to another topography that remains stable again, suggesting quasi-simultaneity of activity of large scale brain networks (Lehmann et al., 1987). Four recurrent and dominant classes of microstates (commonly labeled A, B, C, and D, based on their topographies) are observed in resting-state



EEG, explaining around 65 to 84% of the variance of the data (Michel & Koenig, 2018). EEG microstates are closely related to resting-state networks found in resting-state functional magnetic resonance (Britz et al., 2010). Here, we used Cartool (Brunet et al., 2011) to extract the above-mentioned four microstate classes from the EEG data and compute their temporal parameters as well as the transition probability from one microstate class to another one.

### Temporal Parameters of EEG microstates

We conducted the same analysis as in da Cruz et al. (2020). For each participant and microstate class, we computed three microstate temporal parameters: mean duration, time of coverage, and frequency of occurrence. Mean duration (in ms) is the average time that a given microstate is present uninterruptedly. Time of coverage (%) is the percentage of the total recording time spent in a given microstate. Occurrence is the average number of times a given microstate occurred per second.

### Transition Probabilities

To investigate the transition probability from one microstate class to another one, also known as the syntax analysis, we computed the occurrence frequency of transitions from one class to all the others (Lehmann et al., 2005). After normalization to fractions of all between-class transitions of the participant, we obtained, for each participant, the observed probability of each possible transition. Twelve transitions between microstates classes (sum of transitions from one of the 4 classes to all the remaining 3 classes) were obtained for each subject. Similarly to Lehmann and colleagues (2005), given the occurrence of each microstate class, we also calculated the expected transition probability for each possible transition. We then used the difference between the expected and the observed transition probabilities for the statistical analyses.

### Functional Connectivity Analysis (across electrodes)

Normal brain functioning requires coordinated flow of information between different brain areas. A way to quantify this flow of information is through functional connectivity analysis. Formally, functional connectivity is defined as the statistical relationship between the measures of activity of spatially distant neurophysiological events over time (Friston, 1994). In EEG, functional connectivity can be assessed both at the electrode and source level. Here, we describe how we conducted the connectivity estimation in the electrode space. All connectivity estimation measures were computed on a spatial Laplacian transformed EEG, also commonly referred to as current source density (CSD) or scalp current density (SCD) (Kayser & Tenke, 2006). The analysis was conducted on FieldTrip (Oostenveld et al., 2010). First, the spatial Laplacian transformed EEG time-series were converted into the frequency domain by using multitaper frequency transformation. Then we calculated the connectivity matrices for the directed transfer function, the imaginary part of coherency, and the phase-locking value. Finally, we performed a network analysis on the connectivity matrices to characterize them with a small number of measures. Please see Network Analysis for more information.

### Directed Transfer Function (DTF)

Directed Transfer Function (DTF) was first introduced by Kaminski and Blinowska as a method to determine the direction and frequency content of brain activity flow (Kaminski & Blinowska, 1991). DTF is based on the transfer function  $H(f)$  of a multivariate autoregressive (MVAR) model, describing the causal influence of electrode  $l$  on electrode  $k$  at a frequency  $f$  as follows:

$$DTF_{l \rightarrow k}(f) = \frac{|H_{kl}(f)|^2}{\sum_{j=1}^J |H_{kj}(f)|^2}$$

where  $J$  is the total number of electrodes. DTF is zero only if there is no delay between electrode  $l$  and electrode  $k$ . For more information, see (Kaminski & Blinowska, 1991).

### Imaginary Part of Coherency

Coherence measures the phase coupling between electrode  $k$  and electrode  $l$  (Nunez et al., 1997). If  $Y_{kt}(f)$  is the Fourier transform of the time series  $y(t)$  of electrode  $k$ , then the cross-spectrum of electrode  $k$  and electrode  $l$  is given by

$$S_{kl}(f) = \frac{1}{T} \sum_{t=1}^T Y_{kt}(f) Y_{lt}^*(f)$$

Then the complex coherence at frequency  $f$  is given by

$$C_{kl}(f) = \frac{S_{kl}(f)}{(S_{kk}(f) S_{ll}(f))^{\frac{1}{2}}}$$

Here, we used the imaginary part of coherency since it minimizes effects of volume conduction (Nolte et al., 2004).

### Phase-Locking Value

Phase-Locking Value (PLV) was introduced by Lachaux et al. as a method to detect frequency specific phase coupling between two signals (Lachaux et al., 1999). If  $\Phi_{kt}(f)$  is the phase of the Fourier coefficient of electrode  $k$  of the time segment  $y(t)$  at frequency  $f$ , then PLV between the electrode  $k$  and electrode  $l$  at frequency  $f$  is given by

$$PLV_{kl}(f) = \frac{1}{T} \sum_{t=1}^T \exp(i(\Phi_{kt}(f) - \Phi_{lt}(f)))$$

### Functional Connectivity Analysis (across brain regions)

Besides conducting functional connectivity analysis across electrodes, we also conducted the analysis in the source space across brain regions. Functional connectivity analysis at the source level was conducted

using the software LORETA (Pascual-Marqui et al., 2011). Cortical activity was reconstructed from scalp EEG signals, using the exact low-resolution electromagnetic tomography (eLORETA) algorithm, to a space of 6239 gray matter voxels as implemented in LORETA. We defined 80 seeds of interest (40 per hemisphere) from the Automated Anatomical Labelling (AAL) atlas, similar to a previous schizophrenia EEG study (Andreou et al., 2015). From the solution space, we included all gray matter voxels within a range of 10-mm radius of the seed. Connectivity between reconstructed brain sources was calculated for each frequency band using three different methods: instantaneous phase synchronization, lagged phase synchronization, and lagged coherence. Finally, we performed a network analysis on the connectivity matrices to characterize them with a small number of measures. Please see Network Analysis for more information.

### Instantaneous and lagged phase synchronization

Nonlinear interactions between two time-series may be quantified in the frequency domain using the measure of phase synchronization (Pascual-Marqui, 2007). The instantaneous phase synchronization is defined as

$$\varphi_{k,l}^2(\omega) = \{\text{Re}[f_{k,l}(\omega)]\}^2 + \{\text{Im}[f_{k,l}(\omega)]\}^2$$

which, to reduce the effects of instantaneous non-physiological components, can be reformulated as the lagged phase synchronization given by

$$\varphi_{k,l}^2(\omega) = \frac{\{\text{Im}[f_{k,l}(\omega)]\}^2}{1 - \{\text{Re}[f_{k,l}(\omega)]\}^2}$$

where

$$f_{k,l}(\omega) = \frac{1}{N_R} \sum_{a=1}^{N_R} \left[ \frac{k_a(\omega)}{|k_a(\omega)|} \right] \left[ \frac{l_a^*(\omega)}{|l_a(\omega)|} \right]$$

with the Fourier transforms of the signals denoted as  $k_a(\omega)$  and  $l_a(\omega)$ ,  $N_R$  accounting for the number of epochs, and the superscript “\*” indicating a complex conjugate.  $\text{Re}[c]$  and  $\text{Im}[c]$  are respectively the real and imaginary part of a complex number  $c$ , with brackets indicating the modulus.

### Lagged coherence

Linear lagged connectivity measures the lagged linear dependence between two time-series without being affected by the covariance structure within each time series (Pascual-Marqui, 2007). Lagged coherence is defined as

$$\rho_{k,l}^2(\omega) = \frac{\{\text{Im}[f_{k,l}(\omega)]\}^2}{[f_{k,k}(\omega)][f_{l,l}(\omega)] - \{\text{Re}[f_{k,l}(\omega)]\}^2}$$

where,  $f_{k,l}$ , contrary to the phase synchronization cases, is not normalized, and thus there is an effect of amplitude on the estimation.

## Network Analysis

Network analysis provides a way to characterize brain networks with a small number of neurobiological meaningful measures (Rubinov & Sporns, 2010). We conducted the analysis on FieldTrip (Oostenveld et al., 2010) with the Brain Connectivity Toolbox (Rubinov & Sporns, 2010). From the connectivity matrices obtained with directed transfer function, imaginary part of coherency, and phase-locking value in the electrode space as well as instantaneous and lagged phase synchronization, and lagged coherence in the source space, we calculated the node strength, the clustering coefficient, and the betweenness centrality. We applied the analysis to the whole spectrum and aggregated the results into the 5 frequency bands.

### Node Strength

Node strength is the typical measurement for quantifying the level of node centrality. Important electrodes or brain regions interact with many other electrodes or regions, facilitating functional integration and measures of node centrality assess the importance of individual nodes (Rubinov & Sporns, 2010). Given a node  $i$ , its strength is defined as the sum of all the weights of all edges of the node  $i$  as follows

$$S_i = \sum_j^N w_{ij}$$

where  $w_{ij}$  is the weight of node  $i$  to node  $j$  (Opsahl et al., 2010).

### Clustering Coefficient

Clustering coefficient qualifies the level of connection of a node with other neighboring nodes (Onnela et al., 2005). Given a node  $i$ , the clustering coefficient is calculated as follows

$$C_i = \frac{2}{k_i(k_i - 1)} \sum_{j,k} (w_{ij}w_{jk}w_{ki})^{1/3}$$

where  $w_{ij}$  is the weight of node  $i$  to node  $j$  and  $k$  is the degree of the node.

### Betweenness Centrality

Betweenness centrality is based on the idea that central nodes take part in many short paths in a network and, therefore, are considered key controls of information flow (Freeman, 1978). More specifically, it is

defined as the fraction of all shortest paths in the network that pass through a given node (Brandes, 2001). Betweenness centrality is calculated as follows

$$B(i) = \sum_{i \neq j \neq k} \frac{\sigma_{jk}(i)}{\sigma_{jk}}$$

where  $\sigma_{jk}(i)$  is the shortest path of two nodes that contain  $i$ .

### 3. Supplementary References

- Andreou, C., Nolte, G., Leicht, G., Polomac, N., Hanganu-Opatz, I. L., Lambert, M., Engel, A. K., & Mulert, C. (2015). Increased Resting-State Gamma-Band Connectivity in First-Episode Schizophrenia. *Schizophrenia Bulletin*, 41(4), 930–939. <https://doi.org/10.1093/schbul/sbu121>
- Brandes, U. (2001). A faster algorithm for betweenness centrality. *The Journal of Mathematical Sociology*, 25(2), 163–177. <https://doi.org/10.1080/0022250X.2001.9990249>
- Britz, J., Van De Ville, D., & Michel, C. M. (2010). BOLD correlates of EEG topography reveal rapid resting-state network dynamics. *NeuroImage*, 52(4), 1162–1170. <https://doi.org/10.1016/j.neuroimage.2010.02.052>
- Brunet, D., Murray, M. M., & Michel, C. M. (2011). Spatiotemporal Analysis of Multichannel EEG: CARTOOL. *Intell. Neuroscience*, 2011, 2:1–2:15. <https://doi.org/10.1155/2011/813870>
- Canolty, R. T., & Knight, R. T. (2010). The functional role of cross-frequency coupling. *Trends in Cognitive Sciences*, 14(11), 506–515. <https://doi.org/10.1016/j.tics.2010.09.001>
- da Cruz, J. R., Chicherov, V., Herzog, M. H., & Figueiredo, P. (2018). An automatic pre-processing pipeline for EEG analysis (APP) based on robust statistics. *Clinical Neurophysiology*, 129(7), 1427–1437. <https://doi.org/10.1016/j.clinph.2018.04.600>
- da Cruz, J. R., Favrod, O., Roinishvili, M., Chkonia, E., Brand, A., Mohr, C., Figueiredo, P., & Herzog, M. H. (2020). EEG microstates are a candidate endophenotype for schizophrenia. *Nature Communications*, 11. <https://doi.org/10.1038/s41467-020-16914-1>
- Davidson, B. (2006). *Hurst exponent* (1.0.0.0) [Matlab]. <https://ch.mathworks.com/matlabcentral/fileexchange/9842-hurst-exponent>
- Eckmann, J.-P., Kamphorst, S. O., & Ruelle, D. (1987). Recurrence Plots of Dynamical Systems. *Europhysics Letters (EPL)*, 4(9), 973–977. <https://doi.org/10.1209/0295-5075/4/9/004>
- Eke, A., Herman, P., Kocsis, L., & Kozak, L. R. (2002). Fractal characterization of complexity in temporal physiological signals. *Physiological Measurement*, 23(1), R1–R38. <https://doi.org/10.1088/0967-3334/23/1/201>
- Freeman, L. C. (1978). Centrality in social networks conceptual clarification. *Social Networks*, 1(3), 215–239. Scopus. [https://doi.org/10.1016/0378-8733\(78\)90021-7](https://doi.org/10.1016/0378-8733(78)90021-7)
- Friston, K. J. (1994). Functional and effective connectivity in neuroimaging: A synthesis. *Human Brain Mapping*, 2(1–2), 56–78. <https://doi.org/10.1002/hbm.460020107>
- Hardstone, R., Poil, S.-S., Schiavone, G., Jansen, R., Nikulin, V. V., Mansvelder, H. D., & Linkenkaer-Hansen, K. (2012). Detrended Fluctuation Analysis: A Scale-Free View on Neuronal Oscillations. *Frontiers in Physiology*, 3. <https://doi.org/10.3389/fphys.2012.00450>
- Hegger, R., & Kantz, H. (1999). Improved false nearest neighbor method to detect determinism in time series data. *Physical Review E*, 60(4), 4970–4973. <https://doi.org/10.1103/PhysRevE.60.4970>
- Higuchi, T. (1988). Approach to an irregular time series on the basis of the fractal theory. *Physica D: Nonlinear Phenomena*, 31(2), 277–283. [https://doi.org/10.1016/0167-2789\(88\)90081-4](https://doi.org/10.1016/0167-2789(88)90081-4)
- Hjorth, B. (1970). EEG analysis based on time domain properties. *Electroencephalography and Clinical Neurophysiology*, 29(3), 306–310. [https://doi.org/10.1016/0013-4694\(70\)90143-4](https://doi.org/10.1016/0013-4694(70)90143-4)
- Hurst, H. E. (1957). A Suggested Statistical Model of some Time Series which occur in Nature. *Nature*, 180(4584), 494–494. <https://doi.org/10.1038/180494a0>

- Ibáñez-Molina, A. J., Lozano, V., Soriano, M. F., Aznarte, J. I., Gómez-Ariza, C. J., & Bajo, M. T. (2018). EEG Multiscale Complexity in Schizophrenia During Picture Naming. *Frontiers in Physiology*, 9. <https://doi.org/10.3389/fphys.2018.01213>
- Inouye, T., Shinosaki, K., Sakamoto, H., Toi, S., Ukai, S., Iyama, A., Katsuda, Y., & Hirano, M. (1991). Quantification of EEG irregularity by use of the entropy of the power spectrum. *Electroencephalography and Clinical Neurophysiology*, 79(3), 204–210. [https://doi.org/10.1016/0013-4694\(91\)90138-T](https://doi.org/10.1016/0013-4694(91)90138-T)
- Kaminski, M. J., & Blinowska, K. J. (1991). A new method of the description of the information flow in the brain structures. *Biological Cybernetics*, 65(3), 203–210. <https://doi.org/10.1007/BF00198091>
- Katz, M. J. (1988). Fractals and the analysis of waveforms. *Computers in Biology and Medicine*, 18(3), 145–156. [https://doi.org/10.1016/0010-4825\(88\)90041-8](https://doi.org/10.1016/0010-4825(88)90041-8)
- Kayser, J., & Tenke, C. E. (2006). Principal components analysis of Laplacian waveforms as a generic method for identifying ERP generator patterns: I. Evaluation with auditory oddball tasks. *Clinical Neurophysiology*, 117(2), 348–368. <https://doi.org/10.1016/j.clinph.2005.08.034>
- Lachaux, J.-P., Rodriguez, E., Martinerie, J., & Varela, F. J. (1999). Measuring phase synchrony in brain signals. *Human Brain Mapping*, 8(4), 194–208. [https://doi.org/10.1002/\(SICI\)1097-0193\(1999\)8:4<194::AID-HBM4>3.0.CO;2-C](https://doi.org/10.1002/(SICI)1097-0193(1999)8:4<194::AID-HBM4>3.0.CO;2-C)
- Lehmann, D., Ozaki, H., & Pal, I. (1987). EEG alpha map series: Brain micro-states by space-oriented adaptive segmentation. *Electroencephalography and Clinical Neurophysiology*, 67(3), 271–288. [https://doi.org/10.1016/0013-4694\(87\)90025-3](https://doi.org/10.1016/0013-4694(87)90025-3)
- Lehmann, Dietrich, Faber, P. L., Galderisi, S., Herrmann, W. M., Kinoshita, T., Koukkou, M., Mucci, A., Pascual-Marqui, R. D., Saito, N., Wackermann, J., Winterer, G., & Koenig, T. (2005). EEG microstate duration and syntax in acute, medication-naïve, first-episode schizophrenia: A multi-center study. *Psychiatry Research: Neuroimaging*, 138(2), 141–156. <https://doi.org/10.1016/j.psychres.2004.05.007>
- Lei, M., Wang, Z., & Feng, Z. (2002). A method of embedding dimension estimation based on symplectic geometry. *Physics Letters A*, 303(2), 179–189. [https://doi.org/10.1016/S0375-9601\(02\)01164-7](https://doi.org/10.1016/S0375-9601(02)01164-7)
- Lempel, A., & Ziv, J. (1976). On the Complexity of Finite Sequences. *IEEE Transactions on Information Theory*, 22(1), 75–81. <https://doi.org/10.1109/TIT.1976.1055501>
- Marwan, N. (2017). *Cross recurrence plot toolbox for MATLAB* (5.22) [Matlab].
- Marwan, N., Carmenromano, M., Thiel, M., & Kurths, J. (2007). Recurrence plots for the analysis of complex systems. *Physics Reports*, 438(5–6), 237–329. <https://doi.org/10.1016/j.physrep.2006.11.001>
- Marwan, Norbert, Wessel, N., Meyerfeldt, U., Schirdewan, A., & Kurths, J. (2002). Recurrence-plot-based measures of complexity and their application to heart-rate-variability data. *Physical Review E*, 66(2). <https://doi.org/10.1103/PhysRevE.66.026702>
- Michel, C. M., & Koenig, T. (2018). EEG microstates as a tool for studying the temporal dynamics of whole-brain neuronal networks: A review. *NeuroImage*, 180, 577–593. <https://doi.org/10.1016/j.neuroimage.2017.11.062>
- Mohammadi, S. (2009). LYAPROSEN: MATLAB function to calculate Lyapunov exponent. In *Statistical Software Components*. Boston College Department of Economics. <https://ideas.repec.org/c/boc/bocode/t741502.html>

- Montez, T., Poil, S.-S., Jones, B. F., Manshanden, I., Verbunt, J. P. A., van Dijk, B. W., Brussaard, A. B., van Ooyen, A., Stam, C. J., Scheltens, P., & Linkenkaer-Hansen, K. (2009). Altered temporal correlations in parietal alpha and prefrontal theta oscillations in early-stage Alzheimer disease. *Proceedings of the National Academy of Sciences*, 106(5), 1614–1619. <https://doi.org/10.1073/pnas.0811699106>
- Nolte, G., Bai, O., Wheaton, L., Mari, Z., Vorbach, S., & Hallett, M. (2004). Identifying true brain interaction from EEG data using the imaginary part of coherency. *Clinical Neurophysiology*, 115(10), 2292–2307. <https://doi.org/10.1016/j.clinph.2004.04.029>
- Nunez, P. L., Srinivasan, R., Westdorp, A. F., Wijesinghe, R. S., Tucker, D. M., Silberstein, R. B., & Cadusch, P. J. (1997). EEG coherency: I: statistics, reference electrode, volume conduction, Laplacians, cortical imaging, and interpretation at multiple scales. *Electroencephalography and Clinical Neurophysiology*, 103(5), 499–515. [https://doi.org/10.1016/S0013-4694\(97\)00066-7](https://doi.org/10.1016/S0013-4694(97)00066-7)
- Onnela, J.-P., Saramäki, J., Kertész, J., & Kaski, K. (2005). Intensity and coherence of motifs in weighted complex networks. *Physical Review E*, 71(6), 065103. <https://doi.org/10.1103/PhysRevE.71.065103>
- Oostenveld, R., Fries, P., Maris, E., & Schoffelen, J.-M. (2010). FieldTrip: Open Source Software for Advanced Analysis of MEG, EEG, and Invasive Electrophysiological Data. *Computational Intelligence and Neuroscience*, 2011, e156869. <https://doi.org/10.1155/2011/156869>
- Opsahl, T., Agneessens, F., & Skvoretz, J. (2010). Node centrality in weighted networks: Generalizing degree and shortest paths. *Social Networks*, 32(3), 245–251. <https://doi.org/10.1016/j.socnet.2010.03.006>
- O'Reilly, D., Navakatikyan, M. A., Filip, M., Greene, D., & Van Marter, L. J. (2012). Peak-to-peak amplitude in neonatal brain monitoring of premature infants. *Clinical Neurophysiology*, 123(11), 2139–2153. <https://doi.org/10.1016/j.clinph.2012.02.087>
- Pascual-Marqui, R. D. (2007). Instantaneous and lagged measurements of linear and nonlinear dependence between groups of multivariate time series: Frequency decomposition. *ArXiv:0711.1455 [Stat]*. <http://arxiv.org/abs/0711.1455>
- Pascual-Marqui, R. D., Lehmann, D., Koukkou, M., Kochi, K., Anderer, P., Saletu, B., Tanaka, H., Hirata, K., John, E. R., Prichep, L., Biscay-Lirio, R., & Kinoshita, T. (2011). Assessing interactions in the brain with exact low-resolution electromagnetic tomography. *Philosophical Transactions of the Royal Society A: Mathematical, Physical and Engineering Sciences*, 369(1952), 3768–3784. <https://doi.org/10.1098/rsta.2011.0081>
- Pincus, S. M., Gladstone, I. M., & Ehrenkranz, R. A. (1991). A regularity statistic for medical data analysis. *Journal of Clinical Monitoring*, 7(4), 335–345. <https://doi.org/10.1007/BF01619355>
- Richman, J. S., & Moorman, J. R. (2000). Physiological time-series analysis using approximate entropy and sample entropy. *American Journal of Physiology-Heart and Circulatory Physiology*, 278(6), H2039–H2049. <https://doi.org/10.1152/ajpheart.2000.278.6.H2039>
- Rosenstein, M. T., Collins, J. J., & De Luca, C. J. (1993). A practical method for calculating largest Lyapunov exponents from small data sets. *Physica D: Nonlinear Phenomena*, 65(1), 117–134. [https://doi.org/10.1016/0167-2789\(93\)90009-P](https://doi.org/10.1016/0167-2789(93)90009-P)
- Rubinov, M., & Sporns, O. (2010). Complex network measures of brain connectivity: Uses and interpretations. *NeuroImage*, 52(3), 1059–1069. <https://doi.org/10.1016/j.neuroimage.2009.10.003>



- Stam, C. J. (2005). Nonlinear dynamical analysis of EEG and MEG: Review of an emerging field. *Clinical Neurophysiology*, 116(10), 2266–2301. <https://doi.org/10.1016/j.clinph.2005.06.011>
- Takens, F. (1981). Detecting strange attractors in turbulence. In D. Rand & L.-S. Young (Eds.), *Dynamical Systems and Turbulence, Warwick 1980* (Vol. 898, pp. 366–381). Springer Berlin Heidelberg. <https://doi.org/10.1007/BFb0091924>
- Thai, Q. (2019). *Calc\_lz\_complexity* (1.9.0.0) [Matlab]. [https://www.mathworks.com/matlabcentral/fileexchange/38211-calc\\_lz\\_complexity](https://www.mathworks.com/matlabcentral/fileexchange/38211-calc_lz_complexity)
- Tort, A. B. L., Komorowski, R., Eichenbaum, H., & Kopell, N. (2010). Measuring Phase-Amplitude Coupling Between Neuronal Oscillations of Different Frequencies. *Journal of Neurophysiology*, 104(2), 1195–1210. <https://doi.org/10.1152/jn.00106.2010>
- Uhlhaas, P. J., & Singer, W. (2010). Abnormal neural oscillations and synchrony in schizophrenia. *Nature Reviews Neuroscience*, 11(2), 100–113. <https://doi.org/10.1038/nrn2774>
- von Stein, A., & Sarnthein, J. (2000). Different frequencies for different scales of cortical integration: From local gamma to long range alpha/theta synchronization. *International Journal of Psychophysiology*, 38(3), 301–313. [https://doi.org/10.1016/S0167-8760\(00\)00172-0](https://doi.org/10.1016/S0167-8760(00)00172-0)
- Vorobyov, S., & Cichocki, A. (2002). Blind noise reduction for multisensory signals using ICA and subspace filtering, with application to EEG analysis. *Biological Cybernetics*, 86(4), 293–303. <https://doi.org/10.1007/s00422-001-0298-6>
